# Supplementary material
Source: MDPI journal article supplement (https://www.mdpi.com/2076-3298/11/5/102)
Supplement: s1 [file s1]

# Iron Oxide-Activated Carbon Composites for Enhanced Microwave-Assisted Pyrolysis of Hardwood

Amine Lataf <sup>1</sup>, Andrew E. Khalil Awad <sup>1</sup>, Bjorn Joos <sup>2,3</sup>, Robert Carleer <sup>1</sup>, Jan Yperman <sup>1</sup>, Sonja Schreurs <sup>4</sup>, Jan D'Haen <sup>2</sup>, Ann Cuypers <sup>5</sup> and Dries Vandamme <sup>1,\*</sup>

<sup>1</sup> Analytical and Circular Chemistry, IMO, CMK, Hasselt University, Agoralaan Building D, 3590 Diepenbeek, Belgium; amine.lataf@uhasselt.be (A.L.); andrew.khalilawad@student.uhasselt.be (A.E.K.A.); robert.carleer@uhasselt.be (R.C.); jan.yperman@uhasselt.be (J.Y.)

<sup>2</sup> Institute for Materials Research and Imec division Imomec (IMO-IMOMEC), Hasselt University, 3590 Diepenbeek, Belgium; bjorn.joos@uhasselt.be (B.J.); jan.dhaen@uhasselt.be (J.D.)

<sup>3</sup> EnergyVille, Thor Park 8320, 3600 Genk, Belgium

<sup>4</sup> NuTec, CMK, Hasselt University, Agoralaan Building H, 3590 Diepenbeek, Belgium; sonja.schreurs@uhasselt.be

<sup>5</sup> Environmental Biology, CMK, Hasselt University Agoralaan Building D, 3590 Diepenbeek, Belgium; ann.cuypers@uhasselt.be

\*Correspondence: dries.vandamme@uhasselt.be

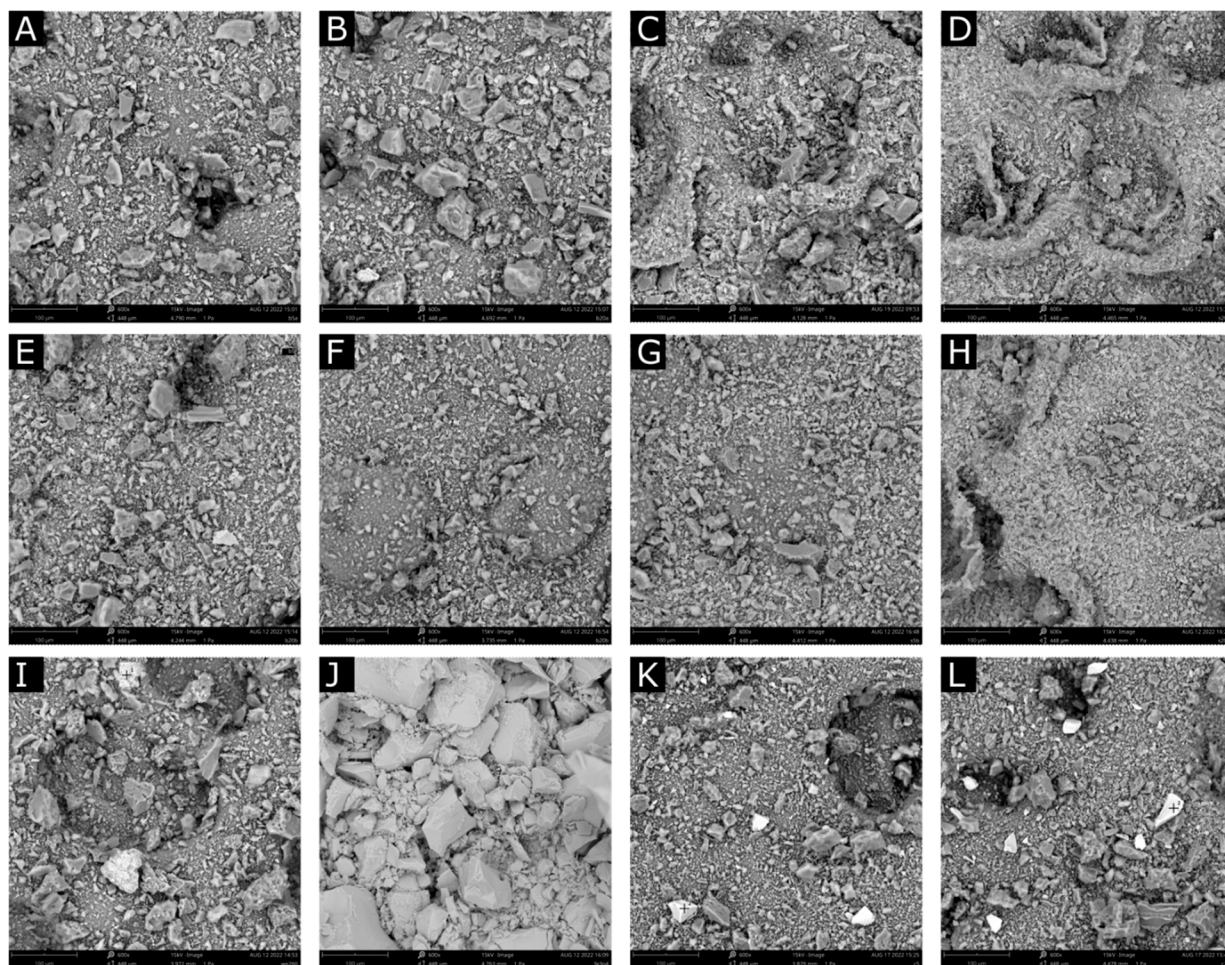

Figure S1 - The SEM pictures of the different used MWAs. A: A0-5; B: A0-20; C: A5; D: A20; E: B0-5; F: B0-20; G: B5; H: B20; I: C0; J: 100% Fe<sub>3</sub>O<sub>4</sub>; K: C5; L: C20 (Phenom Pro X, Thermo Scientific).

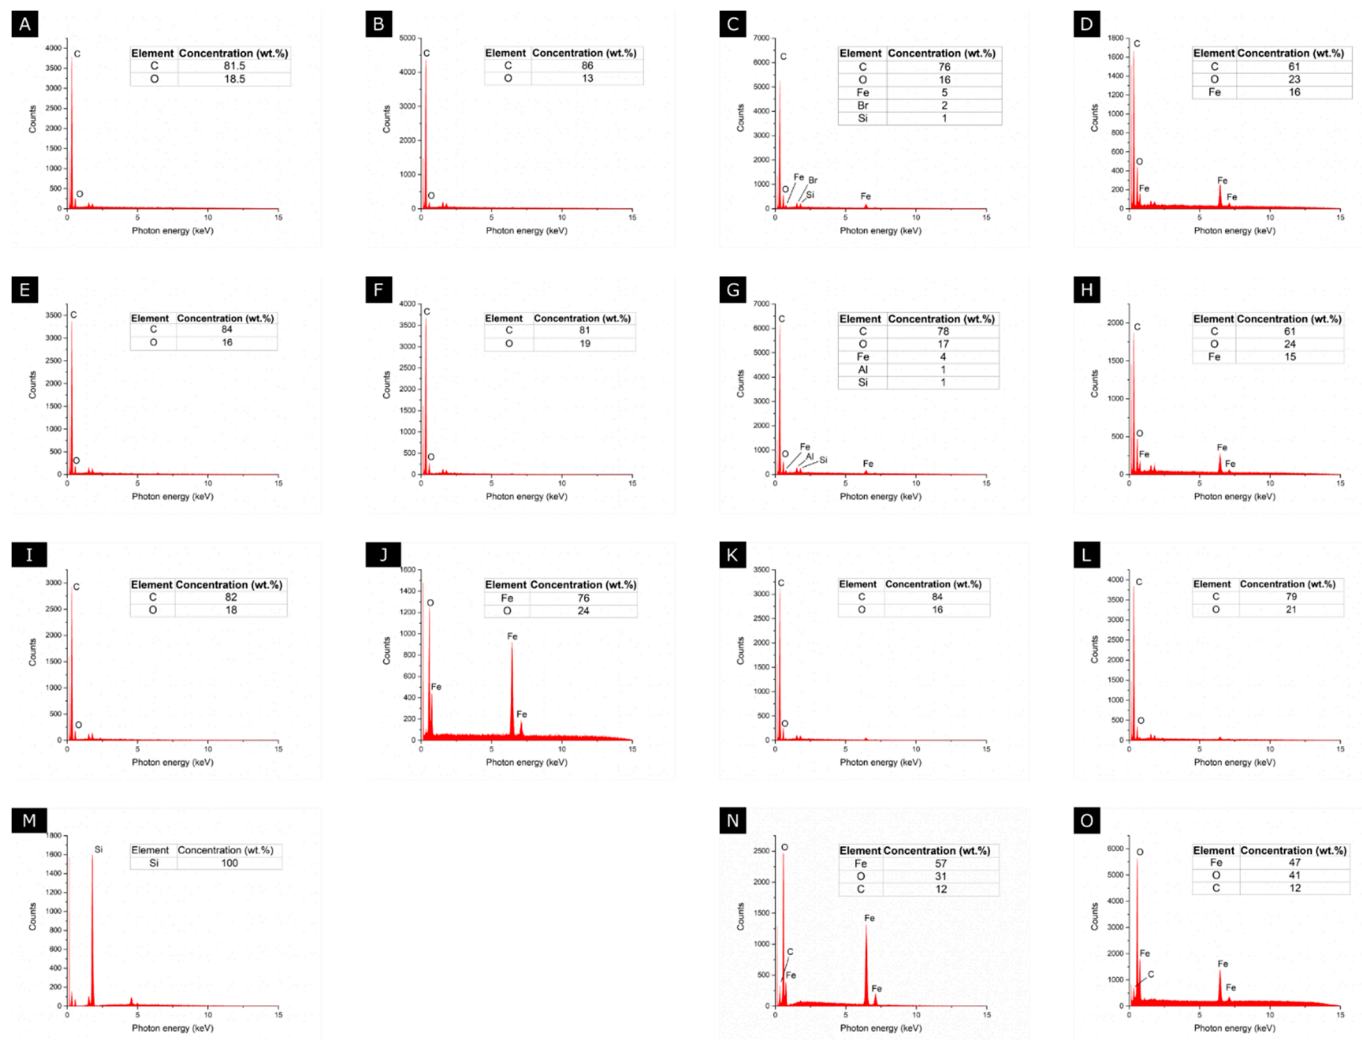

Figure S2- The EDX analysis of the different used MWAs. A: A0-5; B: A0-20; C: A5; D: A20; E: B0-5; F: B0-20; G: B5; H: B20; I: C0; J: 100% Fe<sub>3</sub>O<sub>4</sub>; K: C5; L: C20; M: C0 spot analysis; N: C5 spot analysis; O: C20 spot analysis (Phenom Pro X, Thermo Scientific).

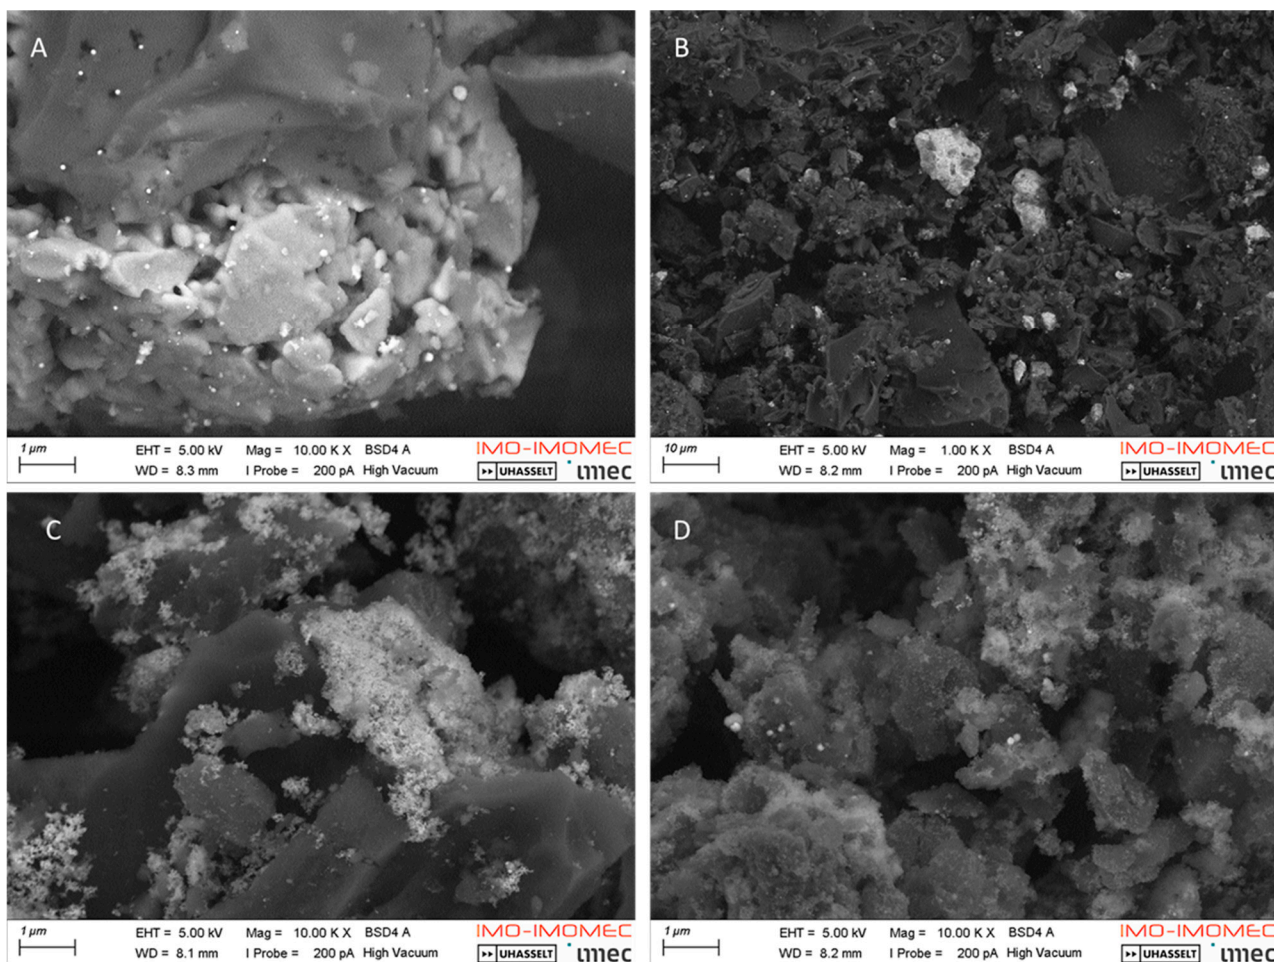

Figure S3 - The SEM pictures of the different used MWAs. A: C0 (10 000 $\times$ ); B: C5 (1000 $\times$ ); C: A5 (10 000 $\times$ ); D: A20 (10 000 $\times$ ) (Zeiss 450 FEGSEM with Gemini 2 optics).
